# Supplementary material for: Gas phase methanol synthesis with Raman spectroscopy for gas composition monitoring
Source: Royal Society of Chemistry journal article supplement (doi:10.1039/d0ra04455e), 2020-01-01
Supplement: d0ra04455e1.pdf [file d0ra04455e1.pdf]

## Supplementary information

*Derivation of the equation for calculation of components' concentrations in the outlet stream.*

Considering two main reaction – carbon dioxide hydrogenation to methanol and RWGS – outlet flowrate of each component can be determined in the following way:

$$F_{outi} = F_{ini} - \vartheta_{MeOH} \cdot x_{MeOH} \cdot F_{ini} - \vartheta_{RWGS} \cdot x_{RWGS} \cdot F_{ini} \quad (1)$$

where:

$F_{ini}$  –  $i$ -component inlet flowrate, Nml/min;

$F_{outi}$  –  $i$ -component outlet flowrate, Nml/min

$\vartheta_{MeOH}$  and  $\vartheta_{RWGS}$  – stoichiometric coefficient of  $i$ -component for carbon dioxide hydrogenation and RWGS reactions respectively;

$x_{MeOH}$  and  $x_{RWGS}$  – reaction extent values for carbon dioxide hydrogenation and RWGS reactions respectively.

The overall outlet flowrate will be thus determined as:

$$F_{out\Sigma} = \sum_{i \in I} (F_{ini} - \vartheta_{MeOH} \cdot x_{MeOH} \cdot F_{ini} - \vartheta_{RWGS} \cdot x_{RWGS} \cdot F_{ini}) \quad (2)$$

where:

$F_{out\Sigma}$  - overall outlet flowrate, Nml/min.

This way:

$$y_i = \frac{F_{outi}}{F_{out\Sigma}} = \frac{F_{ini} \cdot (1 + \vartheta_{MeOH} \cdot x_{MeOH} + \vartheta_{RWGS} \cdot x_{RWGS})}{\sum_{i \in I} F_{ini} \cdot (1 + \vartheta_{MeOH} \cdot x_{MeOH} + \vartheta_{RWGS} \cdot x_{RWGS})} \quad (3)$$

### A.2 Expressions for the kinetic constants used for the reactor modeling

Kinetic constants are determined based on the following equations:

$$k_1 = 2.69 \cdot 10^7 \cdot e^{\left(\frac{-109\,900}{R \cdot T}\right)} \quad (4)$$

$$k_2 = 7.31 \cdot 10^8 \cdot e^{\left(\frac{-123\,400}{R \cdot T}\right)} \quad (5)$$

$$k_3 = 4.36 \cdot 10^2 \cdot e^{\left(\frac{-65\,200}{R \cdot T}\right)} \quad (6)$$

$$K_{CO} = 7.99 \cdot 10^{-7} \cdot e^{\left(\frac{58\,100}{R \cdot T}\right)} \quad (7)$$

$$K_{CO_2} = 1.02 \cdot 10^{-7} \cdot e^{\left(\frac{67\,400}{R \cdot T}\right)} \quad (7)$$

$$\frac{K_{H_2O}}{\sqrt{k_{H_2}}} = 4.13 \cdot 10^{-11} \cdot e^{\left(\frac{104\,500}{R \cdot T}\right)} \quad (8)$$

where:

$R$  – universal gas constant, J/mol/K;

$T$  – reactor temperature, K.

Equilibrium constants are determined based on the following equations:

$$\ln K_1^0(T) = \frac{a1 + a2 \cdot T + a3 \cdot T^2 + a4 \cdot T^3 + a5 \cdot T^4 + a6 \cdot T^5 + a7 \cdot T \cdot \ln\left(\frac{T}{T_0}\right)}{R \cdot T} \quad (9)$$

where:

$$a1 = 74414;$$

$$a2 = 189.26;$$

$$a3 = 3.2443 \cdot 10^{-2};$$

$$a4 = 7.0432 \cdot 10^{-6};$$

$$a5 = -5.6053 \cdot 10^{-9};$$

$$a6 = 1.0344 \cdot 10^{-12};$$

$$a7 = -64.364;$$

$$\ln K_2^0(T) = \frac{b1 + b2 \cdot T + b3 \cdot T^2 + b4 \cdot T^3 + b5 \cdot T^4 + b6 \cdot T^5 + b7 \cdot T \cdot \ln\left(\frac{T}{T_0}\right)}{R \cdot T} \quad (10)$$

where:

$$b1 = -39412.1;$$

$$b2 = -54.1516;$$

$$b3 = -5.5642 \cdot 10^{-2};$$

$$b4 = 2.576 \cdot 10^{-5};$$

$$b5 = 7.6594 \cdot 10^{-9};$$

$$b6 = 1.0161 \cdot 10^{-12};$$

$$b7 = 18.429;$$

$$K_3^0 = K_1^0 \cdot K_2^0 \quad (11)$$

*Table 1. Comparative analysis of the experimental data for the pressure varied experiments*

| Outlet mole fraction, mol.%<br>(95% confidence interval) \ Pressure, bar | 20                  | 30                  | 40                  | 50                  | 60                  |
|--------------------------------------------------------------------------|---------------------|---------------------|---------------------|---------------------|---------------------|
| CO <sub>2</sub> outlet molar fraction experimental value                 | 20.069<br>(± 0.079) | 19.760<br>(± 0.103) | 19.417<br>(± 0.069) | 19.173<br>(± 0.165) | 19.038<br>(± 0.231) |
| CO <sub>2</sub> outlet molar fraction kinetic model value                | 20.882              | 20.371              | 19.963              | 19.616              | 19.309              |
| H <sub>2</sub> outlet molar fraction experiment value                    | 63.625<br>(± 0.066) | 62.644<br>(± 0.145) | 61.606<br>(± 0.088) | 60.921<br>(± 0.267) | 59.497<br>(± 0.373) |
| H <sub>2</sub> outlet molar fraction kinetic model value                 | 64.567              | 63.163              | 61.952              | 60.879              | 59.910              |
| N <sub>2</sub> outlet molar fraction experimental value                  | 9.405<br>(± 0.103)  | 9.526<br>(± 0.132)  | 9.571<br>(± 0.093)  | 9.648<br>(± 0.226)  | 9.794<br>(± 0.223)  |
| N <sub>2</sub> outlet molar fraction kinetic model value                 | 9.386               | 9.535               | 9.667               | 9.790               | 9.899               |
| CO outlet molar fraction experimental value                              | 2.550<br>(± 0.094)  | 2.410<br>(± 0.071)  | 2.241<br>(± 0.101)  | 1.977<br>(± 0.092)  | 1.891<br>(± 0.128)  |
| CO outlet molar fraction kinetic model value                             | 0.961               | 1.025               | 1.031               | 1.015               | 0.991               |
| Methanol outlet molar fraction experimental value*                       | 1.739<br>(± 0.069)  | 2.357<br>(± 0.117)  | 2.974<br>(± 0.067)  | 3.380<br>(± 0.318)  | 4.542<br>(± 0.364)  |
| Methanol outlet molar fraction kinetic model value                       | 1.622               | 2.440               | 3.177               | 3.842               | 4.449               |

*Note: \* - experimental values of methanol outlet concentration determined from the reaction extent approach based data processing algorithm*

*95% confidence interval values for experimentally determined concentrations are provided in parenthesis*

Table 2. Comparative analysis of the experimental data for the temperature varied experiments

| Temperature, °C                                           | 210                 | 220                 | 230                 | 240                 | 250                 | 260                 |
|-----------------------------------------------------------|---------------------|---------------------|---------------------|---------------------|---------------------|---------------------|
| Outlet mole fraction, mol.%                               |                     |                     |                     |                     |                     |                     |
| CO <sub>2</sub> outlet molar fraction experimental value  | 20.083<br>(± 0.105) | 19.710<br>(± 0.094) | 19.417<br>(± 0.069) | 19.254<br>(± 0.144) | 19.071<br>(± 0.700) | 19.129<br>(± 0.116) |
| CO <sub>2</sub> outlet molar fraction kinetic model value | 21.337              | 20.692              | 19.963              | 19.343              | 18.898              | 18.552              |
| H <sub>2</sub> outlet molar fraction experiment value     | 63.333<br>(± 0.052) | 62.582<br>(± 0.089) | 61.606<br>(± 0.088) | 61.119<br>(± 0.094) | 60.736<br>(± 0.118) | 61.572<br>(± 0.150) |
| H <sub>2</sub> outlet molar fraction kinetic model value  | 64.653              | 63.264              | 61.952              | 61.330              | 61.445              | 61.736              |
| N <sub>2</sub> outlet molar fraction experimental value   | 9.143<br>(± 0.163)  | 9.598<br>(± 0.128)  | 9.571<br>(± 0.093)  | 9.447<br>(± 0.131)  | 9.629<br>(± 0.152)  | 9.833<br>(± 0.186)  |
| N <sub>2</sub> outlet molar fraction kinetic model value  | 9.447               | 9.571               | 9.669               | 9.669               | 9.575               | 9.469               |
| CO outlet molar fraction experimental value               | 0.982<br>(± 0.056)  | 1.388<br>(± 0.072)  | 2.241<br>(± 0.101)  | 2.283<br>(± 0.097)  | 2.404<br>(± 0.097)  | 1.982<br>(± 0.102)  |
| CO outlet molar fraction kinetic model value              | 0.321               | 0.594               | 1.031               | 1.651               | 2.376               | 3.041               |
| Methanol outlet molar fraction experimental value*        | 1.931<br>(± 0.116)  | 2.389<br>(± 0.086)  | 2.974<br>(± 0.067)  | 3.220<br>(± 0.111)  | 3.447<br>(± 0.082)  | 2.830<br>(± 0.129)  |
| Methanol outlet molar fraction kinetic model value        | 1.961               | 2.643               | 3.177               | 3.179               | 2.665               | 2.081               |

Note: \* - experimental values of methanol outlet concentration determined from the reaction extent approach based data processing algorithm

95% confidence interval values for experimentally determined concentrations are provided in parenthesis
